# Supplementary material
Source: PubMed Central journal article supplement (PMC3785146)
Supplement: NIHMS53279-supplement-1.pdf [file NIHMS53279-supplement-1.pdf]

# TNF $\alpha$ reverse signaling promotes sympathetic axon growth and target innervation

Lilian Kisiswa, Catarina Osório, Clara Erice, Thomas Vizard, Sean Wyatt and Alun Davies

## Supplementary Figure 1: Deletion of either *tnfa* or *tnfr1* does not affect the levels of tyrosine hydroxylase and the number of neurons in the SCG.

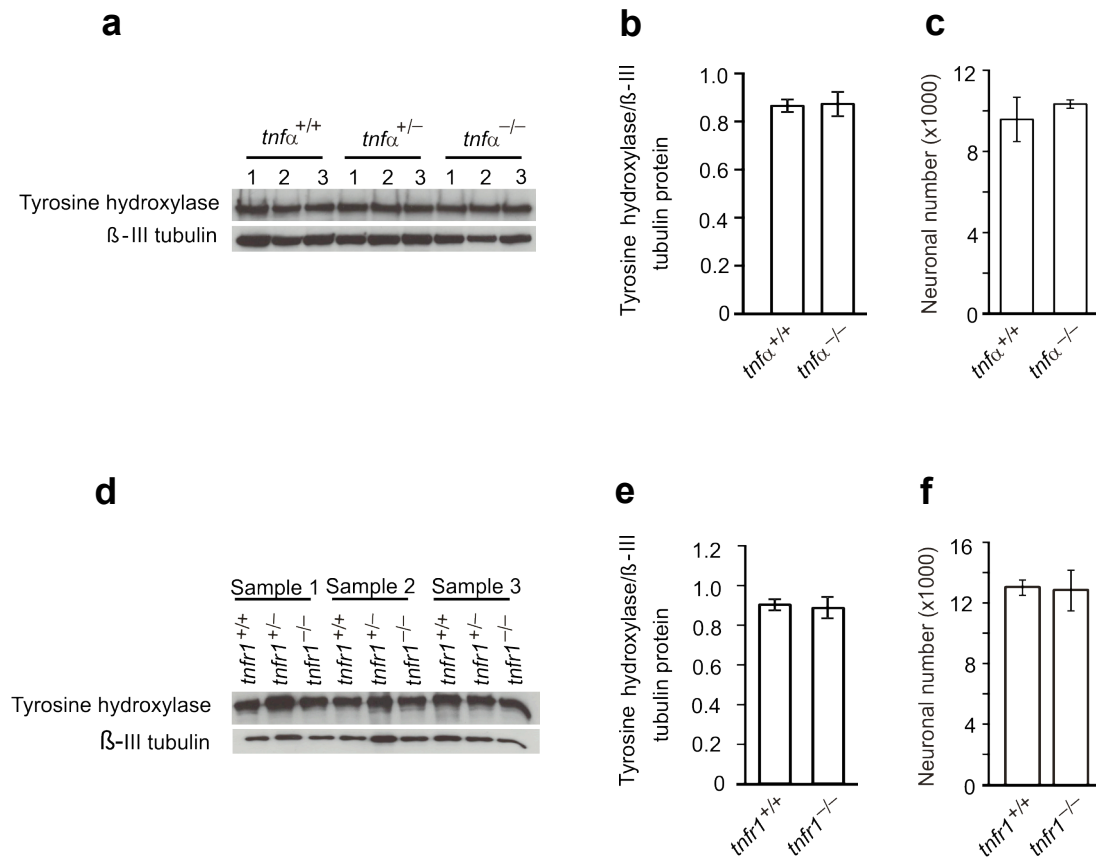

(a) Western blots of lysates of SCG from three separate P10 *tnfa*<sup>+/+</sup>, *tnfa*<sup>+/-</sup> and *tnfa*<sup>-/-</sup> mice probed for tyrosine hydroxylase and  $\beta$ -III tubulin.

(b) Levels of tyrosine hydroxylase protein relative to  $\beta$ -III tubulin in the SCG of P10 *tnfa*<sup>+/+</sup> and *tnfa*<sup>-/-</sup> littermates.

(c) Estimates of the number of neurons in the SCG of P10 *tnfa*<sup>+/+</sup> and *tnfa*<sup>-/-</sup> littermates. Mean  $\pm$  s.e.m of data from three animals of each genotype are shown.

(d) Western blots of lysates of SCG from three separate P10 *tnfr1*<sup>+/+</sup>, *tnfr1*<sup>+/-</sup> and *tnfr1*<sup>-/-</sup> mice probed for tyrosine hydroxylase and  $\beta$ -III tubulin.

(e) Levels of tyrosine hydroxylase protein relative to  $\beta$ -III tubulin in the SCG of P10 *tnfr1*<sup>+/+</sup> and *tnfr1*<sup>-/-</sup> littermates.

(f) Estimates of the number of neurons in the SCG of P10 *tnfr1*<sup>+/+</sup> and *tnfr1*<sup>-/-</sup> littermates. Mean  $\pm$  s.e.m of data from three animals of each genotype are shown.

**Supplementary Figure 2: Reduced sympathetic innervation density in *tnfa*<sup>-/-</sup> and *tnfr1*<sup>-/-</sup> mice quantified by DBH immunohistochemistry.**

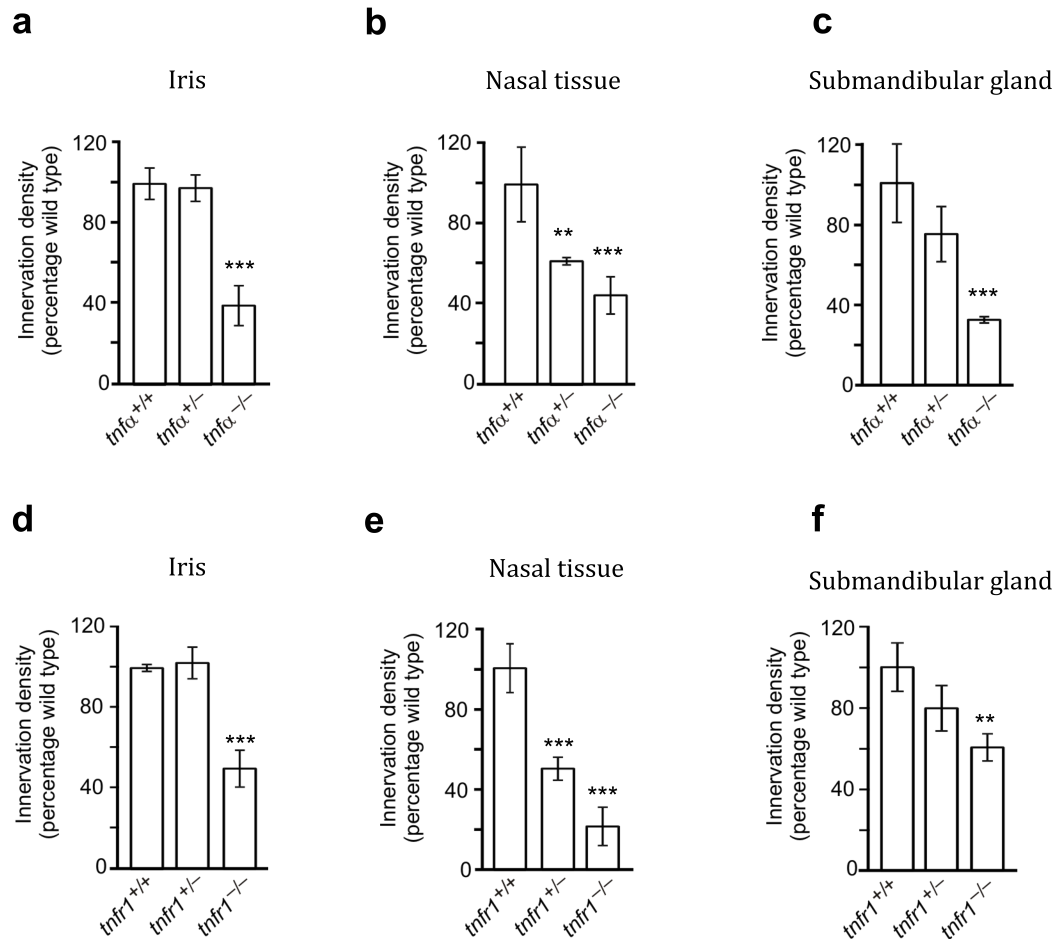

**(a)** Relative levels of DBH immunofluorescence in the iris, nasal turbinate tissue and submandibular gland of P10 *tnfa*<sup>+/+</sup>, *tnfa*<sup>+/-</sup> and *tnfa*<sup>-/-</sup> mice expressed as a percentage of the mean level in *tnfa*<sup>+/+</sup> mice. Mean ± s.e.m of data from three animals of each genotype (\*\* indicates P<0.01 and \*\*\* indicates P<0.001, statistical comparison with control).

**(b)** Relative levels of DBH immunofluorescence in the iris, nasal turbinate tissue and submandibular gland of P10 *tnfr1*<sup>+/+</sup>, *tnfr1*<sup>+/-</sup> and *tnfr1*<sup>-/-</sup> mice expressed as a percentage of the mean level in P10 *tnfr1*<sup>+/+</sup> mice. Mean ± s.e.m of data from three animals of each genotype (\*\* indicates P<0.01 and \*\*\* indicates P<0.001, statistical comparison with control).

### Supplementary Figure 3: Full-length Western blots.

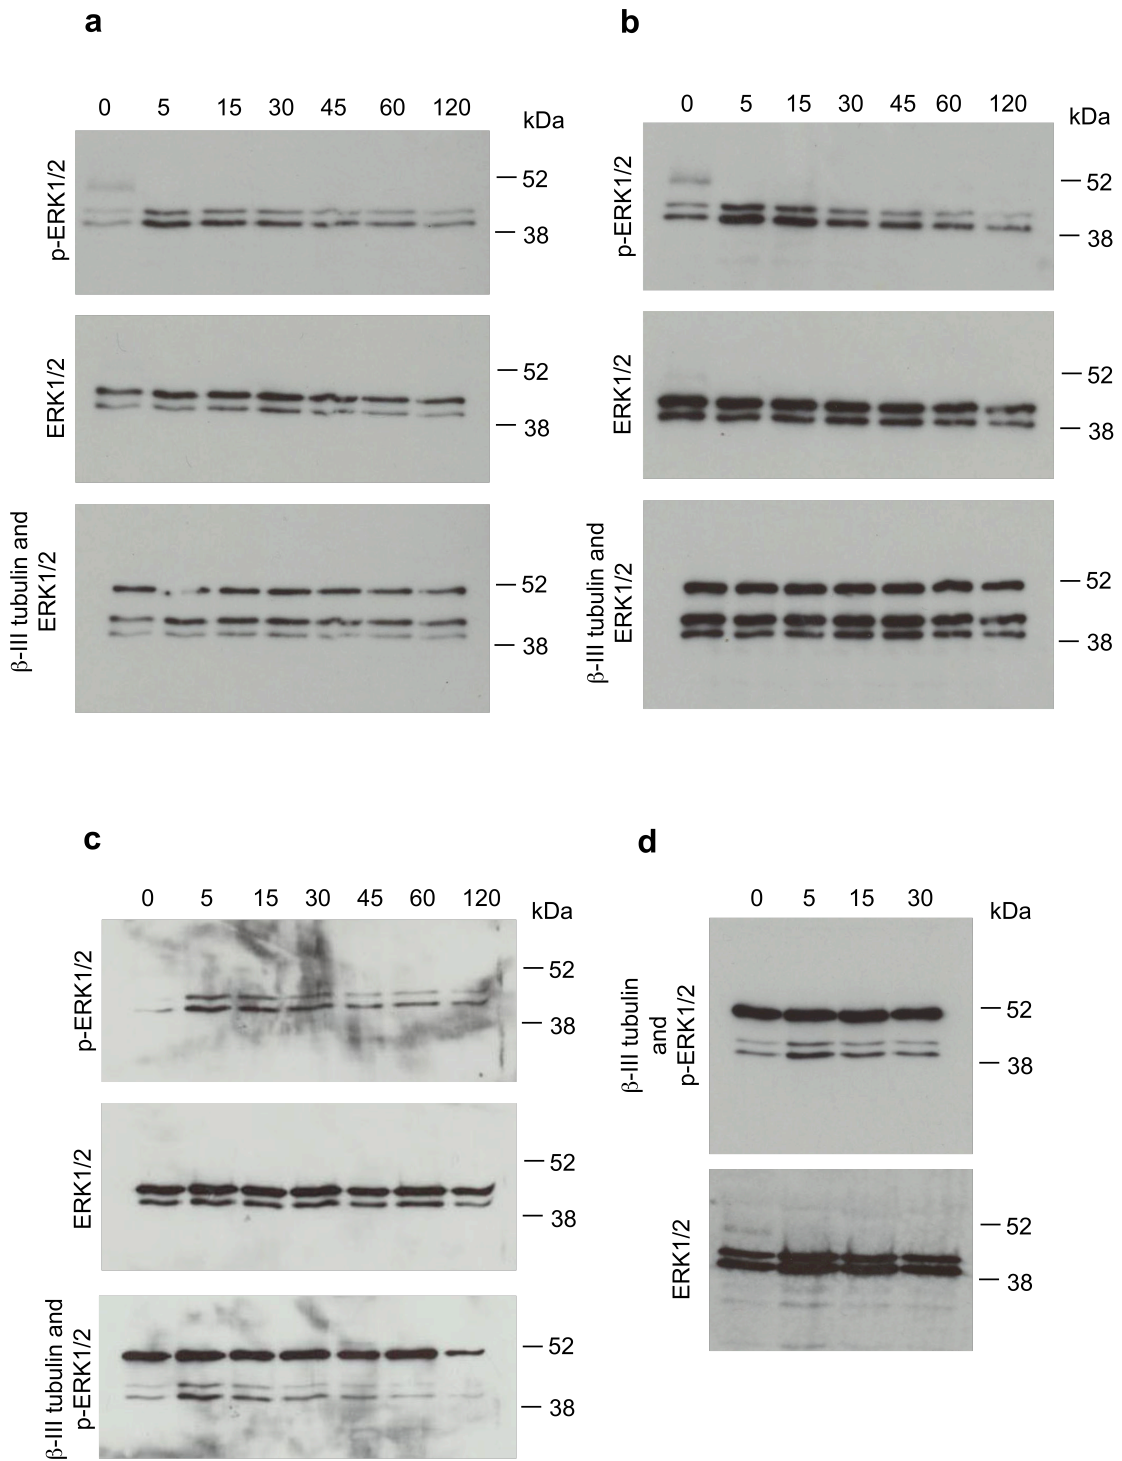

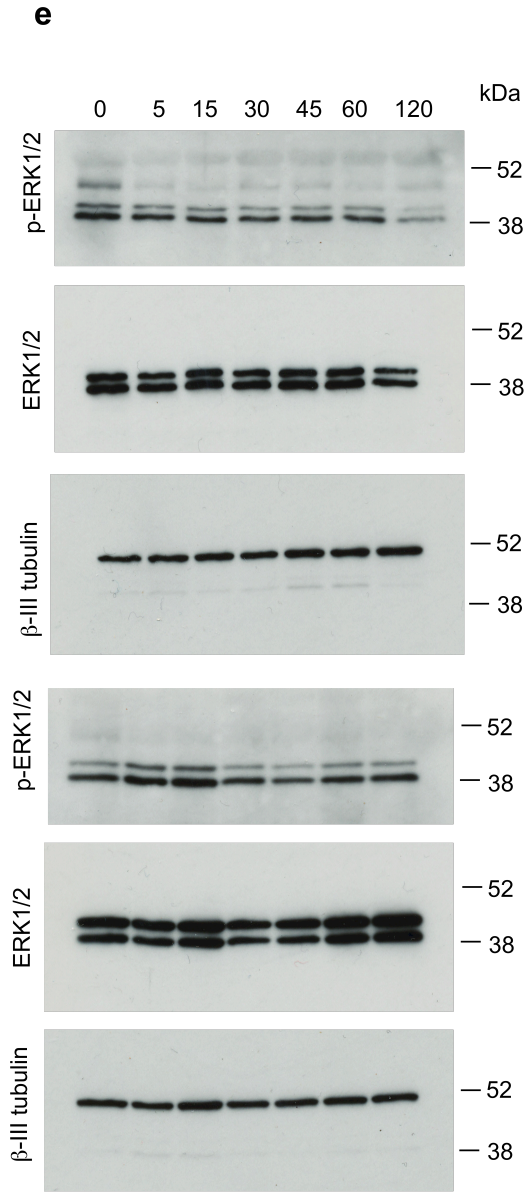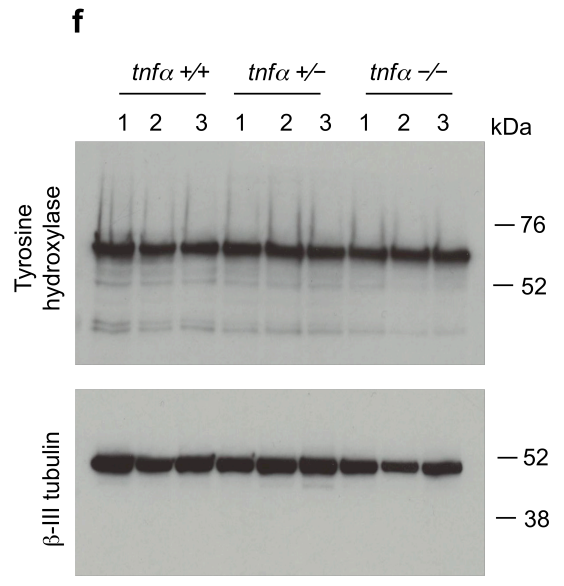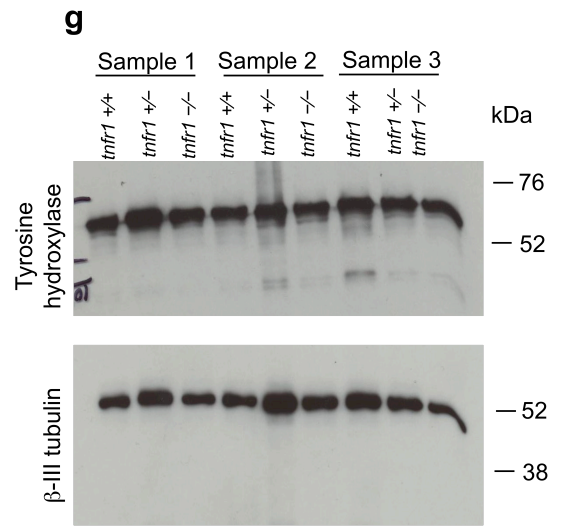

**(a)** Full-length Western blots of Fig. 6a. Top panel shows blot of membrane probed for phospho ERK1/2, middle blots is the blot probed with antibody against total ERK1/2 and the bottom blots was probed with antibody against  $\beta$ -III tubulin (top band) without total ERK1/2 (bottom two bands) being stripped off. All three antibodies were stained using the same membrane after stripping off previous antibody.

**(b)** Full-length Western blots of Fig. 6b. Top panel shows the blot of membrane probed for phospho ERK1/2, middle blots is the blot probed with antibody against total ERK1/2 and the bottom blots was probed with antibody against  $\beta$ -III tubulin (top band) without total ERK1/2 (bottom two bands) being stripped off. All three antibodies were stained using the same membrane after stripping off previous antibody.

**(c)** Full-length Western blots of Fig. 6c. Top panel shows the blot of membrane probed for phospho ERK1/2, middle blots is the blot probed with antibody against total ERK1/2 and the bottom blots was probed with antibody against  $\beta$ -III tubulin (top band) without phospho ERK1/2 (bottom two bands) being stripped off. All three antibodies were stained using the same membrane after stripping off previous antibody.

**(d)** Full-length Western blots of Fig. 6d. Top blot if of membrane probed with antibody against  $\beta$ -III tubulin (top band) without phospho ERK1/2 (bottom two bands) being stripped off. The bottom blot shows total ERK1/2. All three antibodies were stained using the same membrane after stripping off previous antibody.

**(e)** Full-length Western blots of Fig. 6i. The first three panels shows blots of membrane probed with antibodies against phospho ERK1/2 (top panel), total ERK 1/2 (second panel) and  $\beta$ -III tubulin (third panel) of figure 6i top western blot. The bottom three blots are of membrane probed with antibodies against phospho ERK1/2 (forth panel), total ERK1/2 (fifth panel) and  $\beta$ -III tubulin (last panel) of figure 6i bottom western blot.

**(f)** Full-length Western blots of Suppl. Fig. 1a. Blot of membrane probed with antibody against tyrosine hydroxylase (top panel). The membrane was then stripped off and re-probed with antibody against  $\beta$ -III tubulin (bottom panel)

**(g)** Full-length Western blots of Suppl. Fig. 1d. Top panel show blot of membrane probed with antibody against tyrosine hydroxylase. The membrane was then stripped off and re-probed with antibody against  $\beta$ -III tubulin (bottom panel)
